# Supplementary material for: Investigating the Prediction Accuracy of Recently Updated Intraocular Lens Power Formulas with Artificial Intelligence for High Myopia
Source: MDPI journal article supplement (doi:10.3390/jcm11164848), 2022-08-18
Supplement: s1 [file s1]

**Supplemental Table S1.** *p* Values in Post Hoc Analyses.

|                  | Hill vs.<br>Kane | Hill vs.<br>BUII | Hill vs.<br>Haigis | Hill vs.<br>SRK/T | Kane vs.<br>BUII | Kane vs.<br>Haigis | Kane vs.<br>SRK/T | BUII vs.<br>Haigis | BUII vs.<br>SRK/T | Haigis vs.<br>SRK/T |
|------------------|------------------|------------------|--------------------|-------------------|------------------|--------------------|-------------------|--------------------|-------------------|---------------------|
| Prediction error | 1.0              | <0.001 *         | <0.001 *           | <0.001 *          | <0.001 *         | <0.001 *           | <0.001 *          | <0.001 *           | <0.001 *          | <0.001 *            |
| Absolute error   | 1.0              | <0.001 *         | 0.85               | 1.0               | <0.001 *         | 0.83               | 1.0               | 1.0                | 1.0               | 1.0                 |
| Within ±0.25 D   | 1.0              | 0.014 *          | 0.4                | 1.0               | 0.34             | 1.0                | 1.0               | 1.0                | 1.0               | 1.0                 |
| Within ±0.50 D   | N/A              | N/A              | N/A                | N/A               | N/A              | N/A                | N/A               | N/A                | N/A               | N/A                 |
| Within ±1.00 D   | N/A              | N/A              | N/A                | N/A               | N/A              | N/A                | N/A               | N/A                | N/A               | N/A                 |

\* *p* < 0.05. Hill = Hill-RBF3.0; BUII = Barrett Universal II; D = diopters. Wang Koch adjustment was applied for the Haigis and SRK/T formulas.

**Supplemental Table S2.** *p* Values in Post Hoc Analyses in Eyes with Axial Length > 28.0 mm.

|                  | Hill vs.<br>Kane | Hill vs.<br>BUII | Hill vs.<br>Haigis | Hill vs.<br>SRK/T | Kane vs.<br>BUII | Kane vs.<br>Haigis | Kane vs.<br>SRK/T | BUII vs.<br>Haigis | BUII vs.<br>SRK/T | Haigis<br>vs.<br>SRK/T |
|------------------|------------------|------------------|--------------------|-------------------|------------------|--------------------|-------------------|--------------------|-------------------|------------------------|
| Prediction error | 0.0025 *         | <0.001 *         | <0.001 *           | <0.001 *          | <0.001 *         | <0.001 *           | <0.001 *          | <0.001 *           | <0.001 *          | 0.003 *                |
| Absolute error   | 0.76             | 0.17             | 0.015 *            | 0.21              | 0.32             | 0.067              | 0.69              | 1.0                | 1.0               | 0.035 *                |
| Within ±0.25 D   | 0.74             | 0.43             | 0.022 *            | 0.96              | 1.0              | 0.26               | 1.0               | 1.0                | 1.0               | 0.46                   |
| Within ±0.50 D   | 1.0              | 1.0              | 0.7                | 1.0               | 0.41             | 0.16               | 0.46              | 1.0                | 1.0               | 1.0                    |
| Within ±1.00 D   | 1.0              | 1.0              | 1.0                | 1.0               | 1.0              | 1.0                | 1.0               | 1.0                | 1.0               | 1.0                    |

\* *p* < 0.05. Hill = Hill-RBF3.0; BUII = Barrett Universal II; N/A = not applicable; D = diopters. Wang Koch adjustment was applied for the Haigis and SRK/T formulas.

**Supplemental Table S3.** *p* Values in Post Hoc Analyses in Eyes with Axial Length < 28.0 mm.

|                  | Hill vs.<br>Kane | Hill vs.<br>BUII | Hill vs.<br>Haigis | Hill vs.<br>SRK/T | Kane vs.<br>BUII | Kane vs.<br>Haigis | Kane vs.<br>SRK/T | BUII vs.<br>Haigis | BUII vs.<br>SRK/T | Haigis vs.<br>SRK/T |
|------------------|------------------|------------------|--------------------|-------------------|------------------|--------------------|-------------------|--------------------|-------------------|---------------------|
| Prediction error | 1.0              | <0.001 *         | <0.001 *           | <0.001 *          | <0.001 *         | <0.001 *           | <0.001 *          | <0.001 *           | <0.001 *          | 0.0014 *            |
| Absolute error   | 1.0              | 0.0024 *         | 1.0                | 1.0               | 0.0019*          | 1.0                | 1.0               | 1.0                | 0.92              | 1.0                 |
| Within ±0.25 D   | N/A              | N/A              | N/A                | N/A               | N/A              | N/A                | N/A               | N/A                | N/A               | N/A                 |
| Within ±0.50 D   | N/A              | N/A              | N/A                | N/A               | N/A              | N/A                | N/A               | N/A                | N/A               | N/A                 |
| Within ±1.00 D   | N/A              | N/A              | N/A                | N/A               | N/A              | N/A                | N/A               | N/A                | N/A               | N/A                 |

\* *p* < 0.05. Hill = Hill-RBF3.0; BUII = Barrett Universal II; N/A = not applicable; D = diopters. Wang Koch adjustment was applied for the Haigis and SRK/T formulas.
